# Supplementary material for: Black TiO2 inverse opals for visible-light photocatalysis
Source: Royal Society of Chemistry journal article supplement (doi:10.1039/c5ra10280d), 2015-01-01
Supplement: c5ra10280d1.pdf [file c5ra10280d1.pdf]

## Electronic Supplementary Information

### **Black TiO<sub>2</sub> Inverse Opals for Visible-Light Photocatalysis**

Linlin Xin<sup>a</sup> and Xuefeng Liu<sup>b</sup>

<sup>a</sup> *School of Chemical and Material Engineering, Jiangnan University, Wuxi, 214122, PR China.*

<sup>b</sup> *The Key Laboratory of Food Colloids and Biotechnology, Ministry of Education, Jiangnan University, Wuxi, 214122, PR China.*

## **Contents**

- 1. Synthesis**
- 2. Characterization of TiO<sub>2</sub>**
- 3. Figures**
- 4. References**

# **1 Synthesis**

## **1.1 Preparation of polystyrene (PS) nanospheres template**

The monodispersed PS nanospheres (diameter of 360 nm) were prepared by a method of soap free emulsion polymerization,<sup>1</sup> and then a thickness of about 10.4  $\mu\text{m}$  PS opal on the surface of the monocrystalline silicon wafer was obtained by evaporation induced self-assembly vertically.

## **1.2 Fabrication of white $\text{TiO}_2$ inverse-opals**

Firstly, titanium isopropoxide (50  $\mu\text{L}$ ) was dropped to the 1 cm $\times$ 4 cm PS opal template, and then was putted into a Petri dish at 70  $^\circ\text{C}$  in vacuum for 20 h. Secondly, the above-prepared sample was calcined in a tubular furnace at 500  $^\circ\text{C}$  for 5 h under  $\text{O}_2$  atmosphere with a heating rate of 1  $^\circ\text{C}/\text{min}$ .

## **1.3 Hydrogenation**

The as-prepared WTIOs were hydrogenated at 500  $^\circ\text{C}$  (the heating rate is 5  $^\circ\text{C}/\text{min}$ ) for 2 h under  $\text{H}_2$  atmosphere. At the end of the heating period, the sample was cooled to room temperature naturally under  $\text{H}_2$  atmosphere, named black  $\text{TiO}_2$  inverse opals (BTIOs).

## **1.4 Preparation of black $\text{TiO}_2$ inverse-opals fragments**

The black  $\text{TiO}_2$  inverse-opals fragments (BT Fs) can be obtained when BTIOs scraped from the silicon wafer surface.

## **1.5 Photocatalytic activity test**

The photocatalytic degradations of methylene blue (MB, 100mL,  $1.0\times 10^{-5}$

<sup>5</sup>mol/L) were carried out in jacket beakers at room temperature. The jacket of beakers was filled with 1.0 mol/L NaNO<sub>2</sub> aqueous solution to filter off ultraviolet light<sup>2</sup> (Fig. S7). A 300 W Xe arc lamp with a cold trap was used as the light source. Prior to irradiation, the solution was stirred for 1 h in the dark room to reach the absorption-desorption equilibrium between the catalysts and MB. The concentration of the MB was analyzed by monitoring the absorbance at 664 nm by a TU-1900 UV-Vis spectrophotometer.

## **2 Characterization of TiO<sub>2</sub>**

The morphologies of PS nanospheres, PS opals, WTIOs and BTIOs were observed by field-emission scanning electron microscopy (FE-SEM, Hitachi S-4800, operated at an accelerating voltage of 2 kV) and transmission electron microscopy (TEM, JEM-2100, operated at an accelerating voltage of 200 kV). The crystallinity of WTIOs and BTIOs was assessed by X-ray powder diffraction (XRD, Bruker D8, Cu K $\alpha$ 1 radiation, 40 kV, 40 mA). The bandgap of the samples was characterized with UV-Vis diffuse reflectance adsorption spectroscopy (UV-Vis, TU-1900) equipped with an integrating sphere, and BaSO<sub>4</sub> was used as a reflectance standard. Micro-Raman (Raman, Invia, 532 nm) analysis was used to study the vibrational modes of the samples. Brunauer-Emmett-Teller (BET, ASAP2020 MP) method was utilized to calculate the specific surface area.

## 2 Figures

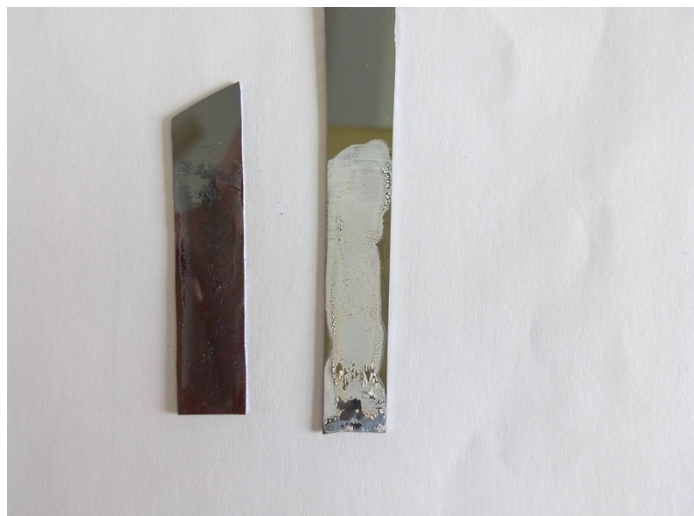

Fig. S1 Digital photos of BTIOs and WTIOs

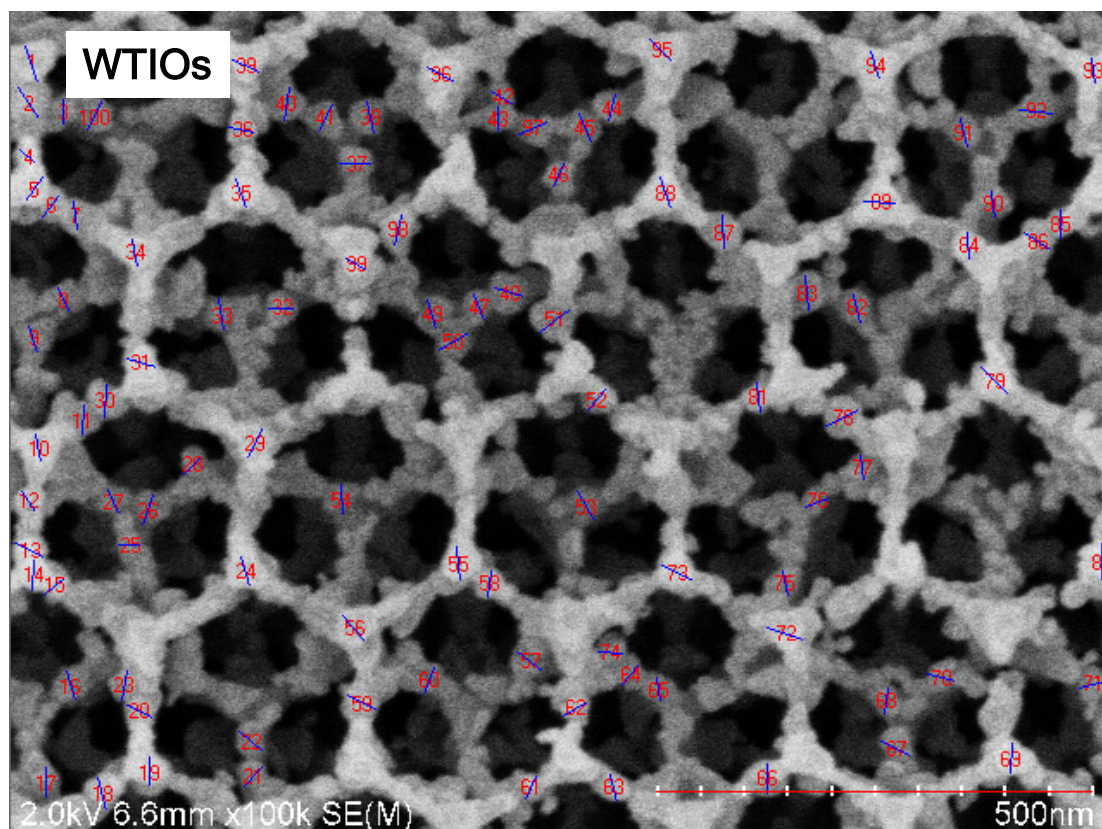

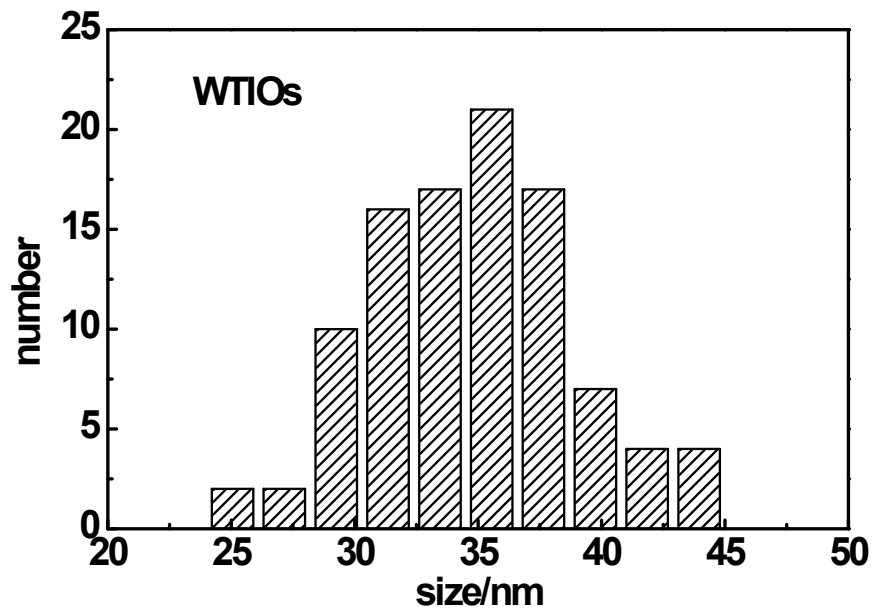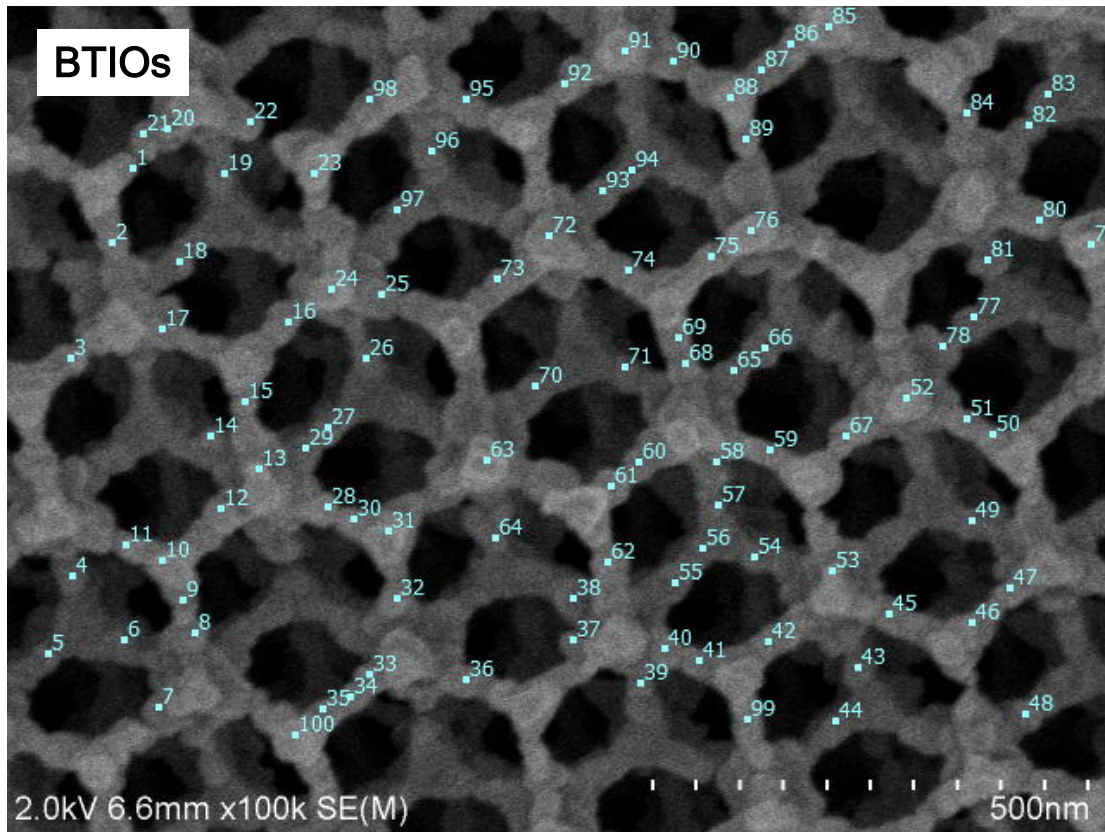

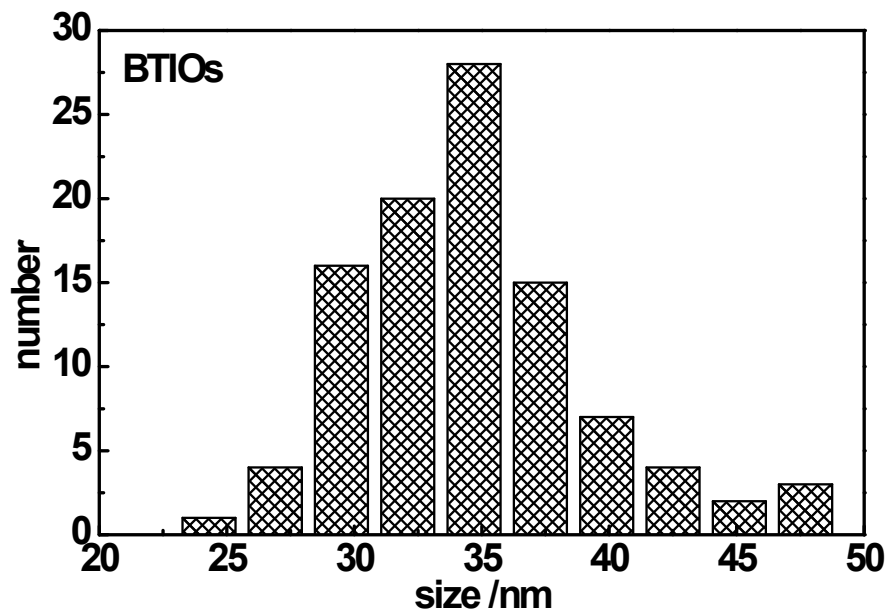

Fig.S2 the statistical data of  $\text{TiO}_2$  grain size of WTIOs and BTIOs obtained from 100 particles in SEM images of WTIOs and BTIOs, respectively

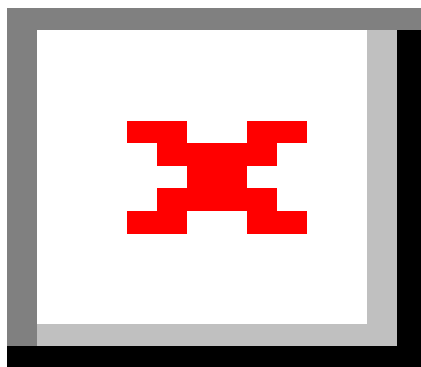

Fig. S3 SEM image of BT Fs

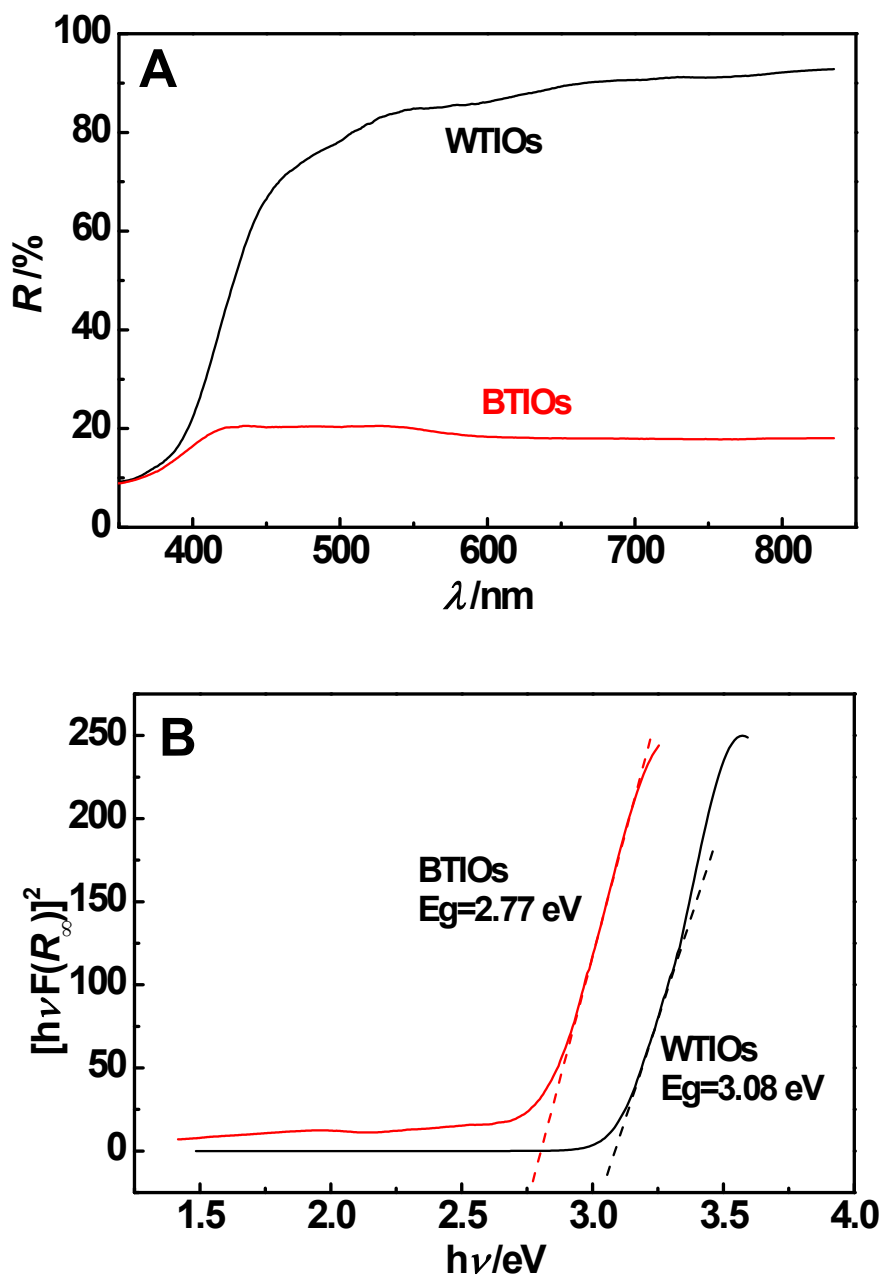

Fig. S4 UV-vis diffuse reflectance spectra (A) and the corresponding  $\text{h}\nu - [\text{h}\nu F(R_\infty)]^2$  curves (B) of BTIOs and WTIOs

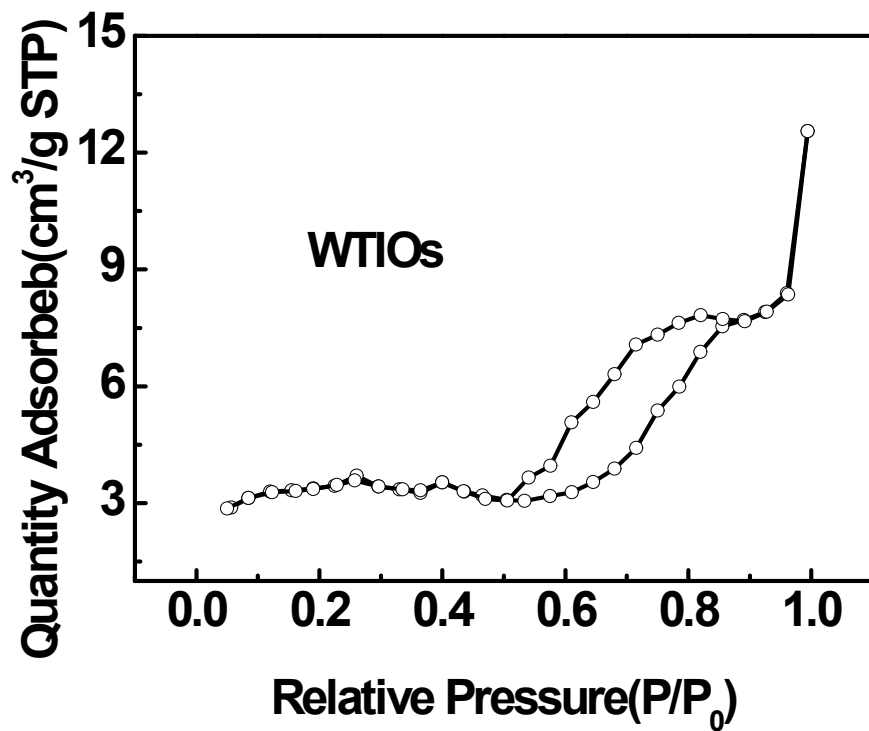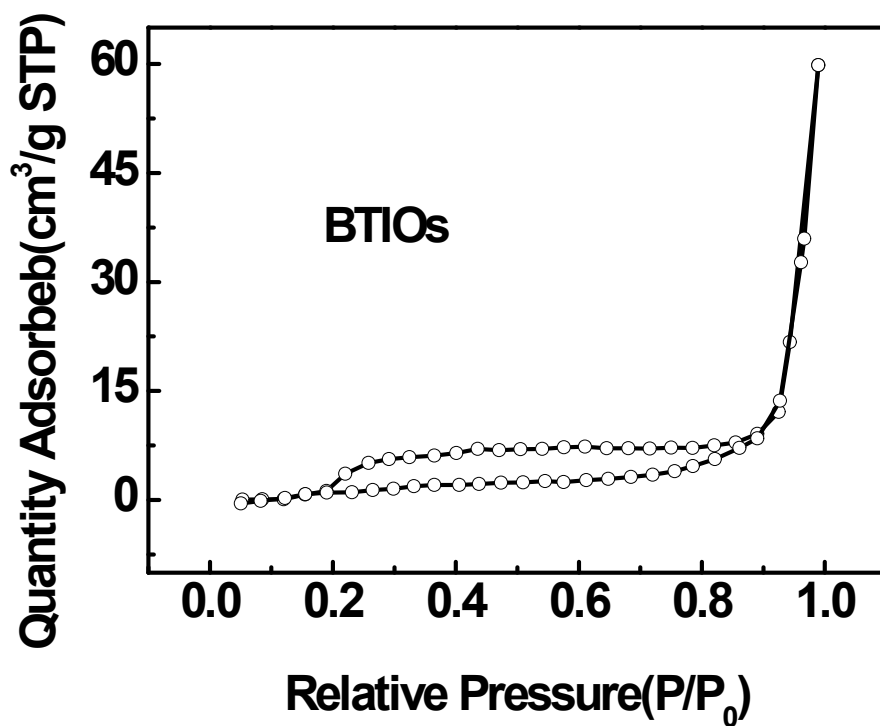

Fig. S5 Nitrogen isotherm adsorption-desorption curves of WTIOs and BTIOs



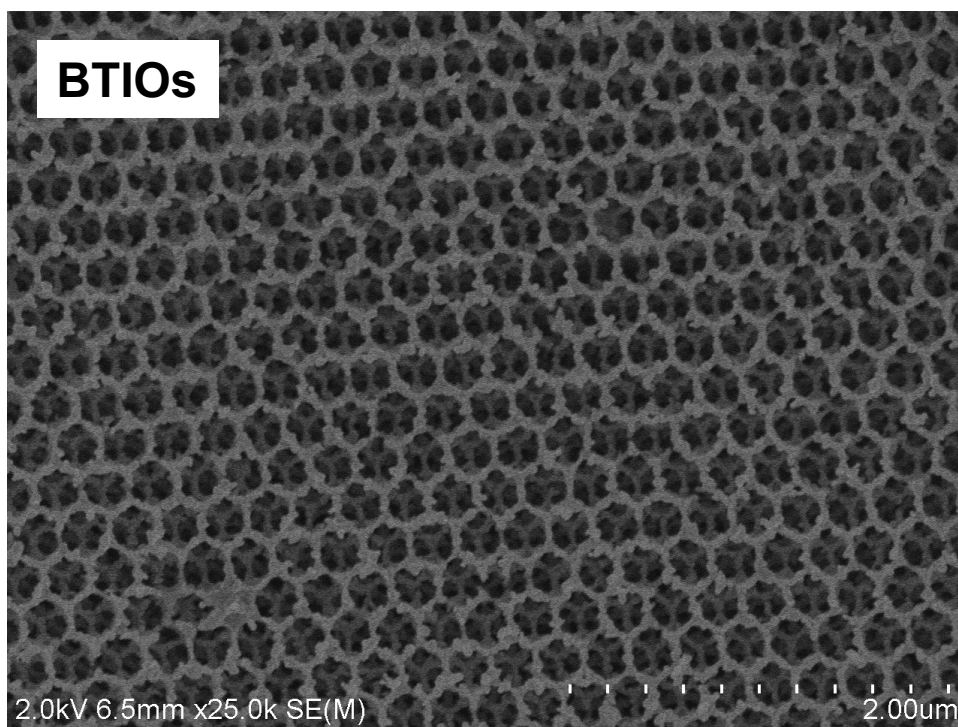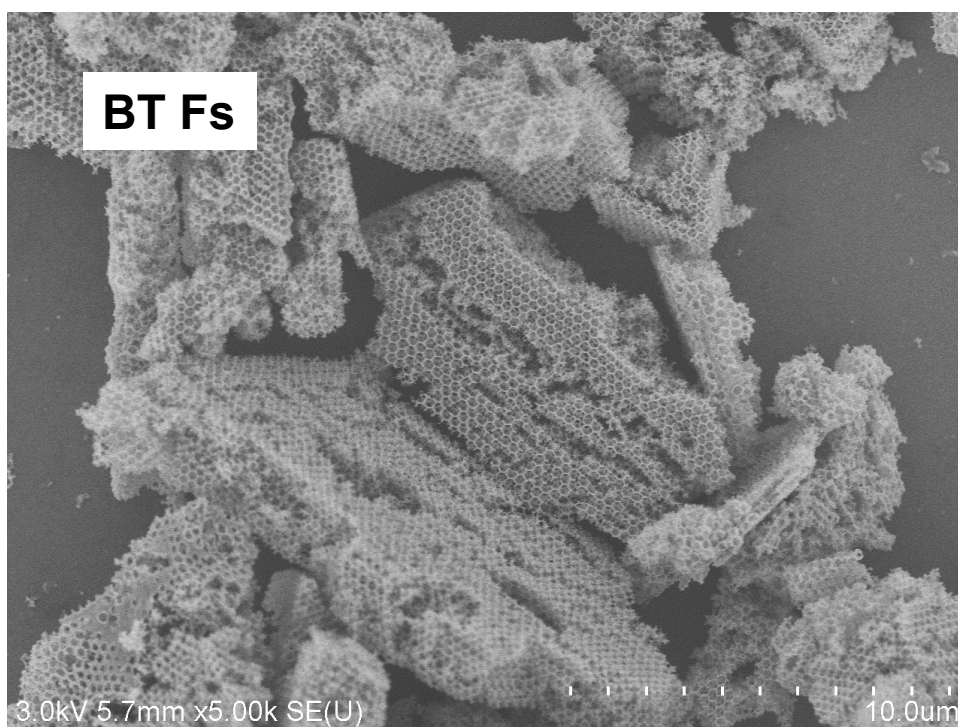

Fig. S6 SEM images of BTIOs and BT Fs after ten times recycling

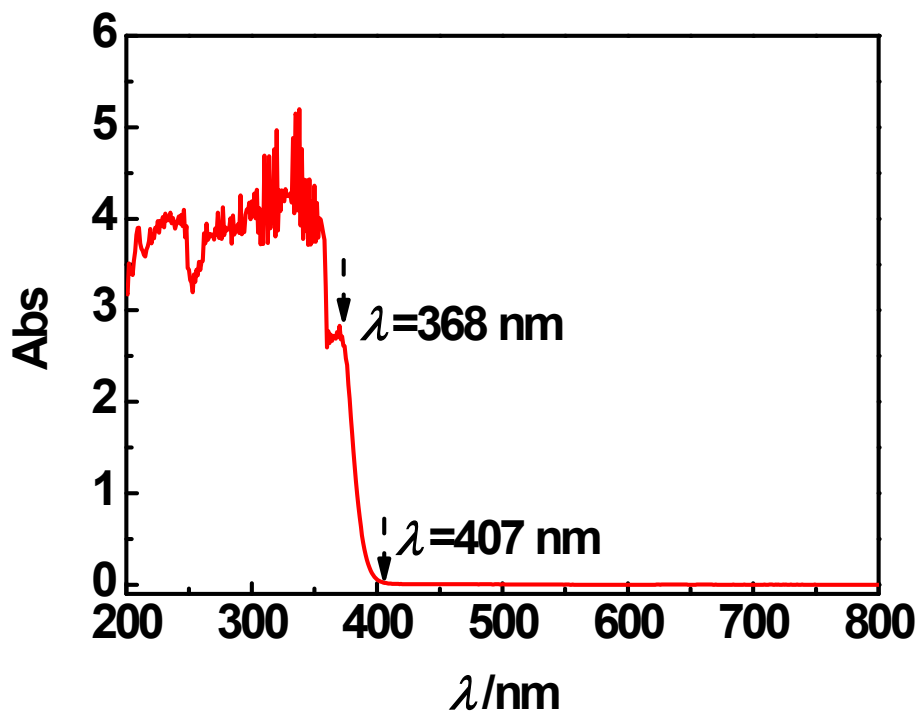

Fig. S7 The UV-vis adsorption spectrum of 1 mol/L NaNO<sub>2</sub> aqueous solution

#### 4 References

- (1) Chen, X.; Li, Z.; Ye, J.; Zou, Z. Forced Impregnation Approach to Fabrication of Large-Area, Three-Dimensionally Ordered Macroporous Metal Oxides. *Chem. Mater.* **2010**, 22, 3583–3585.
- (2) Cheng P.; Li W.; Zhou T.; Jin Y.; Gu M. Physical and Photocatalytic Properties of Zinc Ferrite Doped Titania under Visible Light Irradiation. *J. Photochem. Photobiol. A* **2004**, 168(1): 97–101.
